# Supplementary material
Source: Springer Nature journal article supplement (https://www.springermedizin.de/resource/supplementary/12885_2007_1018_MOESM2_ESM.pdf/9471928)

a) Baseline vs. 1 mo

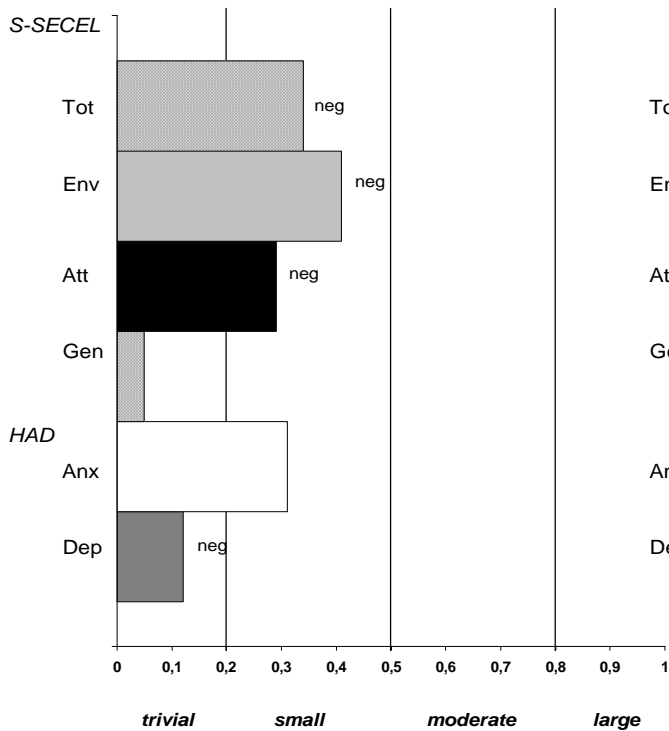

b) Baseline vs. 12 mo

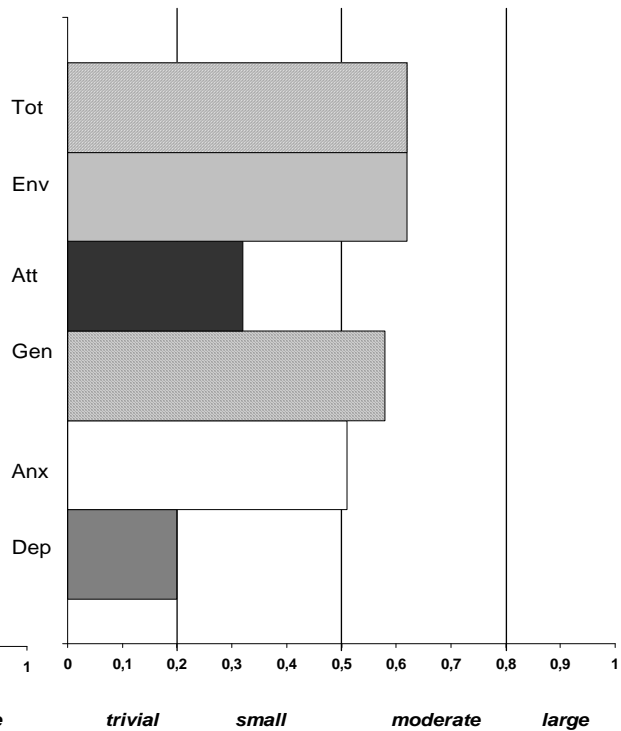

Supplement: MOESM2 [file 9471928]
